# Supplementary figures and images for: A microfluidic organotypic device for culture of mammalian intestinesex vivo
Source: Royal Society of Chemistry journal article supplement (doi:10.1039/c9ay02038a), 2019-12-09

**Supplemental Figure 1:**

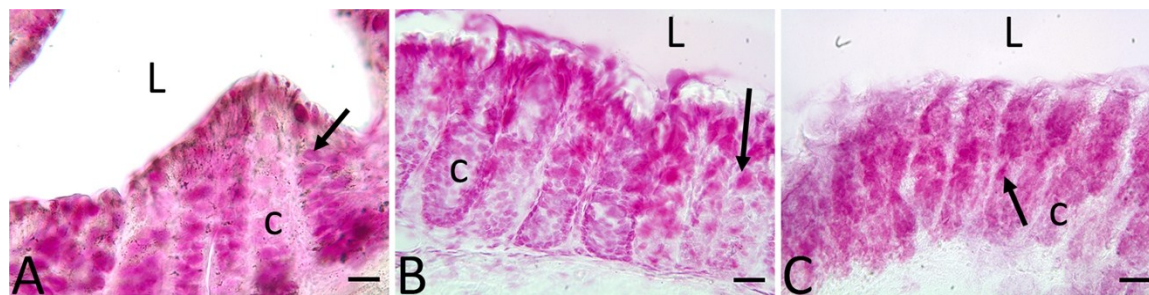

Supplement: c9ay02038a2.pdf [file c9ay02038a2.pdf]
